# Supplementary material for: A novel stimuli-responsive fluorescent elastomer based on an AIE mechanism
Source: Royal Society of Chemistry journal article supplement (doi:10.1039/c5py01273b), 2015-01-01
Supplement: c5py01273b1.pdf [file c5py01273b1.pdf]

## *Supporting Information for*

# **A novel stimuli-responsive fluorescent elastomer based on AIE mechanism**

Weili Li<sup>†a,b\*</sup>, Dong Huang<sup>†a</sup>, Jun Wang<sup>a</sup>, Wenjun Shen<sup>a</sup>, Lizhuang Chen<sup>a</sup>, Shengyuan Yang<sup>b</sup>, Meifang Zhu<sup>b</sup>, Benzhong Tang<sup>c,d\*</sup>, Guodong Liang<sup>e</sup>, Zhexiao Xu<sup>f</sup>

<sup>a</sup> School of Material Science and Engineering, Jiangsu University of Science and Technology, Zhenjiang 212003, China

<sup>b</sup> State Key Laboratory for Modification of Chemical Fibers and Polymer Materials, Donghua University

<sup>c</sup> HKUST-Shenzhen Research Institute, No. 9 Yuexing 1st RD, South Area, Hi-tech Park, Nanshan, Shenzhen 518057, China

<sup>d</sup> Department of Chemistry, Institute for Advanced Study, Institute of Molecular Functional Materials, Division of Biomedical Engineering, Division of Life Science and State Key Laboratory of Molecular Neuroscience, The Hong Kong University of Science & Technology (HKUST), Clear Water Bay, Kowloon, Hong Kong.

<sup>e</sup> DSAP lab, PCFM lab, GDHPPC lab, School of Chemistry and Chemical Engineering, Sun Yat-Sen University, Guangzhou 510275, China.

<sup>f</sup> Suzhou Jiren Hi-Tech Material Co., Ltd, Suzhou 215143.

## **Experimental Section**

### **Synthesis of TPE-2CH<sub>2</sub>Br**

The reaction was carried out under a nitrogen atmosphere. Briefly, cross McMurry coupling reaction of dimethyl benzophenone catalyzed by TiCl<sub>4</sub>-Zn in THF was lasted for 12h to obtain dimethyl tetraphenylethylene (TPE-2CH<sub>3</sub>). The precipitate was filtered off and the filtrate was evaporated to dryness in vacuo. The residue was then dissolved in dichloromethane, and the solution was washed by

distilled water twice. The collected organic layer was dried by sodium sulfate, and the solvent was removed in vacuo. Purification by silica gel column chromatography (eluent, hexane) afforded TPE-2CH<sub>3</sub> as a white powder. <sup>1</sup>H NMR (Bruker ARX 400 NMR spectrometers, CDCl<sub>3</sub>) δ (ppm) 7.20-6.93(m,18H), 2.22(s,6H). Then TPE-2CH<sub>3</sub> together with N-bromosuccinimide (NBS) were dissolved in CCl<sub>4</sub> at mol rate of 1:1.2, after that, BPO was added into the solution at weight ratio of 5%, the blends were stirred and refluxed overnight. The precipitate was filtered off, and the filtrate was evaporated to dryness in vacuo. Purification by silica gel column chromatography (eluent, hexane: chloroform=9:1,v/v) afforded TPE-2CH<sub>2</sub>Br as a white yellow powder. <sup>1</sup>H NMR (400MHz, CDCl<sub>3</sub>), δ(ppm) 7.17-7.12(m, 10H), 7.05-6.99(m, 8H), 4.45(s, 2H), 4.43(s, 2H).

#### **Preparation of TPE-PDMS oligomer**

At first, a certain amount of Aminopropyltriethoxysilane(APTES) was blended with PDMS at room temperature, then DBTDL (0.1%wt) was drop into the blends. After being heated at 60°C with continuous stirring for 6h, the modified PDMS was obtained. Then the modified PDMS was dissolved in THF solution with a certain amount of TPE-2CH<sub>2</sub>Br, the reactants refluxed overnight. After being cooled to room temperature, the product was pour into a certain amount of petroleum ether solvent, the precipitate was filtered off and the dried in vacuo. Then the product was dissolved in THF again, precipitated with petroleum ether solvent and dried in vacuo for three times. After that, the final TPE-PDMS oligomer was obtained.

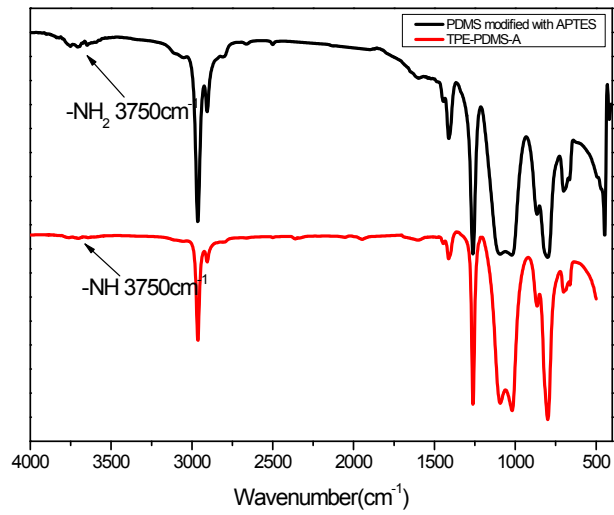

**Fig.1S** FTIR spectra of PDMS modified with APTMS and TPE-PDMS-A

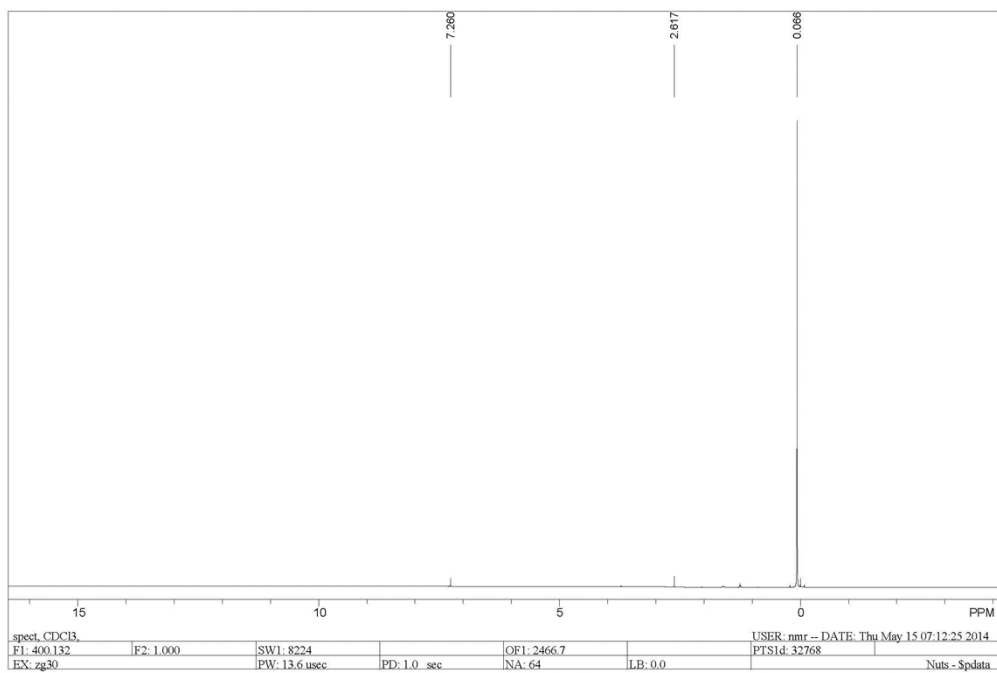

**Fig.2S** <sup>1</sup>H NMR of TPE-PDMS-A

**Table 1S.** Effect of the content of siliane coupling agent on the polymerization of TPE-PDMS oligomer

| Sample     | $M_n$  | $M_w$  | $M_w/M_n$ |
|------------|--------|--------|-----------|
| TPE-PDMS-A | 209000 | 299800 | 1.43      |
| TPE-PDMS-B | 182400 | 262800 | 1.44      |
| TPE-PDMS-C | 143500 | 190900 | 1.33      |
| TPE-PDMS-D | 123700 | 160800 | 1.30      |
| TPE-PDMS-E | 120000 | 151400 | 1.26      |

**Table 2S.** Thermal Transition properties of the elastomers obtained by DSC measurement

| Sample                    | $T_m$    | $\Delta H_m$ |
|---------------------------|----------|--------------|
| STP-A                     | -45.91°C | 25.9J/g      |
| STP-B                     | -44.94°C | 25.28J/g     |
| STP-C                     | -46.12°C | 25.18J/g     |
| STP-D                     | -46.62°C | 21.26J/g     |
| STP-E                     | -45.93°C | 20.45 J/g    |
| pure PDMS-based elastomer | -50.09°C | 18.46J/g     |

**Table 3S.** Mechanical properties of the different elastomers

| Sample | Elongation at break (%) | Tensile modulus | Tensile Strength(MPa) |
|--------|-------------------------|-----------------|-----------------------|
| STP-A  | 406.898                 | 0.878           | 2.493                 |

---

|                  |          |       |       |
|------------------|----------|-------|-------|
| <b>STP-B</b>     | 250.893  | 0.584 | 1.524 |
| <b>STP-C</b>     | 250.835  | 0.579 | 1.342 |
| <b>STP-D</b>     | 244.7814 | 0.561 | 1.244 |
| <b>STP-E</b>     | 200.058  | 0.524 | 0.772 |
| <b>PDMS-TEOS</b> | 251.753  | 0.479 | 0.457 |

---
